# Supplementary material for: Active Beta-Catenin (ABC) promotes an invasive phenotype in pediatric osteosarcoma
Source: Research Square preprint supplement (doi:10.21203/rs.3.rs-4979798/v1), 2024-10-08
Supplement: Supplementary file 1 [file c85653e7a1ccd9dbc137b444.pdf]

A

| ABC and Necrosis         |          |         |
|--------------------------|----------|---------|
|                          | ABC High | ABC Low |
| ≥ 90% Necrosis           | 4        | 11      |
| < 90% Necrosis           | 4        | 11      |
| Fisher (Two-Tailed): 1.0 |          |         |

B

| ABC and Necrosis (at diagnosis) |          |         |
|---------------------------------|----------|---------|
|                                 | ABC High | ABC Low |
| Metastasis at diagnosis         | 4        | 2       |
| No Metastasis at diagnosis      | 4        | 20      |
| Fisher (Two-Tailed): 0.029      |          |         |

C

| ABC and Necrosis (at resection) |          |         |
|---------------------------------|----------|---------|
|                                 | ABC High | ABC Low |
| Metastasis at resection         | 5        | 2       |
| No Metastasis at resection      | 3        | 20      |
| Fisher (Two-Tailed): 0.007      |          |         |
